# Supplementary material for: Colossal barocaloric effect in fatty acid methyl esters
Source: Royal Society of Chemistry journal article supplement (doi:10.1039/d4tc03483j), 2024-11-20
Supplement: d4tc03483j1.pdf [file d4tc03483j1.pdf]

Supplementary Information for

## **Colossal Barocaloric Effect in Fatty Acid Methyl Esters**

Diyi Fu<sup>a,§</sup>, Xiu Su<sup>a,b,§</sup>, Haoyu Wang<sup>c,d,§</sup>, Zhenxing Li<sup>b</sup>, Qiang Zheng<sup>a,\*</sup>, Jun Shen<sup>b</sup>,  
Bing Li<sup>c,d</sup>, Juan Du<sup>a,\*</sup>

<sup>a</sup>Institute of Materials, School of Materials Science and Engineering, Shanghai University, Shanghai, 200444, People's Republic of China

<sup>b</sup>Department of Energy and Power Engineering, School of Mechanical Engineering, Beijing Institute of Technology, Beijing 100081, People's Republic of China

<sup>c</sup>Shenyang National Laboratory for Materials Science, Institute of Metal Research, Chinese Academy of Sciences, 72 Wenhua Road, Shenyang, Liaoning 110016, People's Republic of China

<sup>d</sup>School of Materials Science and Engineering, University of Science and Technology of China, 72 Wenhua Road, Shenyang, Liaoning 110016, China, People's Republic of China

<sup>§</sup>These three authors contribute equally to this work.

\*Corresponding authors:

Qiang Zheng, email: [qiangzheng616@hotmail.com](mailto:qiangzheng616@hotmail.com);

Juan Du, email: [jdu-case@hotmail.com](mailto:jdu-case@hotmail.com)

## Specific heat capacity measurement by DSC

### Calculation of isobaric entropy change and isothermal entropy change at L-S-T

Under a given external pressure, the isobaric entropy change at L-S-T can be calculated by Eq. (S1) by integrating heat data

$$\Delta S_{LS} = \int_{T_1}^{T_2} \frac{1}{T} \frac{Q(P,T)}{T'} dT \quad (S1)$$

where  $Q(P, T)$  is the heat flow after subtracting the baseline, and  $T'$  is the scanning rate.

The isothermal entropy change at L-S-T at different pressures is calculated as

$$\Delta S_{P_0 \rightarrow P} = \Delta S_P - \Delta S_{P_0} \quad (S2)$$

### Calculation of thermal hysteresis:

The thermal hysteresis ( $\Delta T_{hys}$ ) as an inherent property of first-order phase transition which is at ambient pressure. It is always associated with reversibility of the barocaloric effect. The higher the thermal hysteresis, the lower the reversibility of the barocaloric effect (for refrigeration application, lower thermal hysteresis is important).

It was calculated by subtracting the transition temperature during the cooling process from the ones during the heating process.

$$\Delta T_{hys} = T_H - T_C \quad (S3)$$

$T_H$  represents the peak temperature of the phase transition during heating, while  $T_C$  represents the peak temperature of the phase transition during cooling.

## Two methods for calculation of refrigeration capacity:

The refrigeration capacity (RC) as the ability of the barocaloric material to carry heat when the temperature difference between the cold and hot ends is large in the ideal refrigeration cycle equipment.

**Method 1:** According to Wood and Potter's method,<sup>1</sup> the RC value for a reversible refrigeration cycle operating between the hot and cold reservoirs is defined as  $RC = \Delta S_{P_0 \rightarrow P}^{max} \cdot \delta T_{FWHM}$  where  $\Delta S_{P_0 \rightarrow P}^{max}$  is the maximum entropy change at the hot and cold ends of the cycle (defined equal) and  $\delta T_{FWHM}$  full width at half maximum for  $\Delta S_{P_0 \rightarrow P}$ .

$$RC = \Delta S_{P_0 \rightarrow P}^{max} \cdot \delta T_{FWHM} \quad (S4)$$

**Method 2:** The Gschneidner method is to integrate numerically the area below the  $\Delta S_M - T$  curve by using the temperatures at half maximum of the peak as the integration limits, which has been widely used in community.<sup>2</sup>

$$RC = \int_{T_1}^{T_2} \Delta S(T) dT \quad (S5)$$

where  $T_1$  and  $T_2$  are temperatures of the hot and cold sinks at half maximum of the  $\Delta S$  peak, respectively, and  $\Delta S(T)$  is the refrigerants entropy change as a function of temperature.

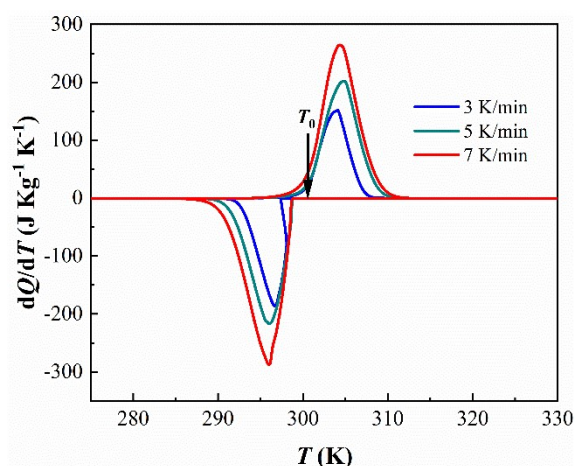

**Figure S1.** Measurements of  $dQ/dT$  after baseline subtraction, on heating ( $dQ/dT > 0$ ) and cooling ( $dQ/dT < 0$ ) across the solid-liquid phase transition, using different temperature ramp rates.

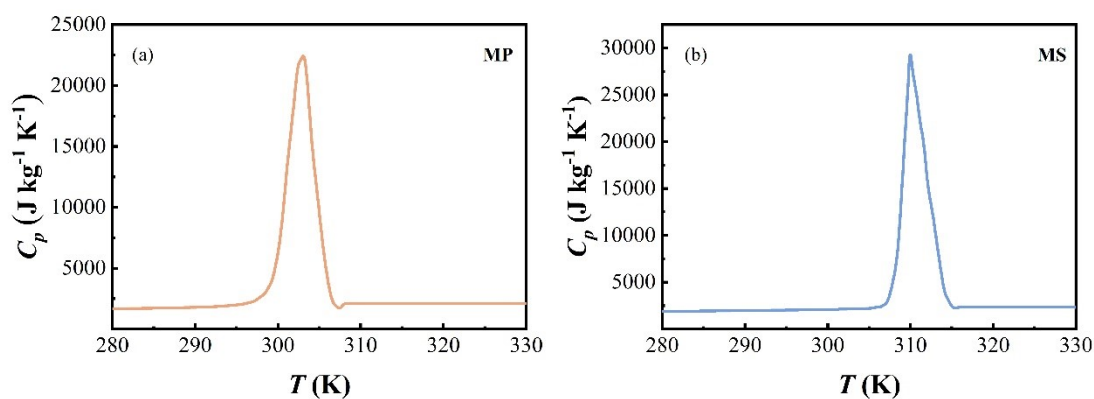

**Figure S2.** The specific heat capacity data of (a) methyl palmitate (MP) and (b) methyl stearate (MS) measured by DSC at atmospheric pressure with a heating rate of 1 K/min.

**Table S1 Raman bands and mode assignments of FAME. Taken from references as indicated.**

| Band number | Band position( $\text{cm}^{-1}$ ) | Assignments                                                                                                                                                       |
|-------------|-----------------------------------|-------------------------------------------------------------------------------------------------------------------------------------------------------------------|
| 1           | 800-920                           | $\nu(\text{C}_1\text{-C}_2)$ , $\text{CH}_3$ , rocking, $\nu(\text{C-O})$ : rocking at terminal methyl and increase in acyl chain trans conformation <sup>3</sup> |
| 2           | 1060-1065                         | $\nu(\text{C-C})_{\text{op}}$ Out-of-phase aliphatic C-C                                                                                                          |

|   |           |                                                                                                                                          |
|---|-----------|------------------------------------------------------------------------------------------------------------------------------------------|
|   |           | stretching all-trans <sup>4,5</sup>                                                                                                      |
| 3 | 1080-1110 | $\nu(\text{C-C})_g$ Liquid aliphatic C–C stretch in gauche and $\nu(\text{C-C})$ Solid aliphatic C–C stretching in gauche <sup>5-7</sup> |
| 4 | 1100-1135 | $\nu(\text{C-C})_{ip}$ In-phase aliphatic C–C stretching all-trans <sup>8</sup>                                                          |
| 5 | 1295-1305 | $\delta(\text{CH}_2)_{tw}$ Methylene twisting deformations <sup>9</sup>                                                                  |
| 6 | 1400-1500 | $\delta(\text{CH}_2)_{sc}$ Methylene scissor deformations <sup>9</sup>                                                                   |
| 7 | 1730-1750 | $\nu(\text{C=O})$ Carbonyl stretching <sup>9</sup>                                                                                       |
| 8 | 2800-2900 | $\nu(\text{CH}_2)_s$ and $\nu(\text{CH}_2)_{as}$ <sup>7</sup>                                                                            |
| 9 | 2900-3000 | $\nu(\text{CH}_3)_s$ and $\nu(\text{CH}_3)_{as}$ <sup>7</sup>                                                                            |

## References

- (1) Wood, M. E.; Potter, W. H. General analysis of magnetic refrigeration and its optimization using a new concept: maximization of refrigerant capacity. *Cryogenics* **1985**, *25* (12), 667-683.
- (2) Gschneidner Jr, K. A.; Pecharsky, V. K.; Pecharsky, A. O.; Zimm, C. B. Recent Developments in Magnetic Refrigeration. *Materials Science Forum* **1999**, *315-317*, 69-76.
- (3) Kint, S.; Wermer, P. H.; Scherer, J. R. Raman spectra of hydrated phospholipid bilayers. 2. Water and head-group interactions. *The Journal of Physical Chemistry* **2002**, *96* (1), 446-452.
- (4) Susi, H.; Sampugna, J.; Hampson, J. W.; Ard, J. S. Laser-Raman investigation of phospholipid-polypeptide interactions in model membranes. *Biochemistry* **1979**, *18* (2), 297-301.
- (5) Beattie, J. R.; Bell, S. E.; Moss, B. W. A critical evaluation of Raman spectroscopy for the analysis of lipids: fatty acid methyl esters. *Lipids* **2004**, *39* (5), 407-419.
- (6) Zerbi, G.; Conti, G.; Minoni, G.; Pison, S.; Bigotto, A. Premelting phenomena in fatty acids: an infrared and Raman study. *The Journal of Physical Chemistry* **2002**, *91* (9), 2386-2393.
- (7) Lawson, E. E.; Anigbogu, A. N.; Williams, A. C.; Barry, B. W.; Edwards, H. G. Thermally induced molecular disorder in human stratum corneum lipids compared with

a model phospholipid system; FT-Raman spectroscopy. *Spectrochim Acta A Mol Biomol Spectrosc* **1998**, *54A* (3), 543-558.

(8) Snyder, R. G.; Cameron, D. G.; Casal, H. L.; Compton, D. A. C.; Mantsch, H. H. Studies on determining conformational order in n-alkanes and phospholipids from the 1130  $\text{cm}^{-1}$  raman band. *Biochimica et Biophysica Acta (BBA) - Biomembranes* **1982**, *684* (1), 111-116.

(9) Sadeghi-Jorabchi, H.; Hendra, P. J.; Wilson, R. H.; Belton, P. S. Determination of the total unsaturation in oils and margarines by fourier transform raman spectroscopy. *Journal of the American Oil Chemists' Society* **1990**, *67* (8), 483-486.
